# Supplementary material for: Specific Human and Candida Cellular Interactions Lead to Controlled or Persistent Infection Outcomes during Granuloma-Like Formation
Source: PubMed Central journal article supplement (PMC5203659; doi:10.1128/iai.00807-16), 2016-12-29
Supplement: IAI.00807-16_zii999091935s1.pdf [file IAI.00807-16_zii999091935s1.pdf]

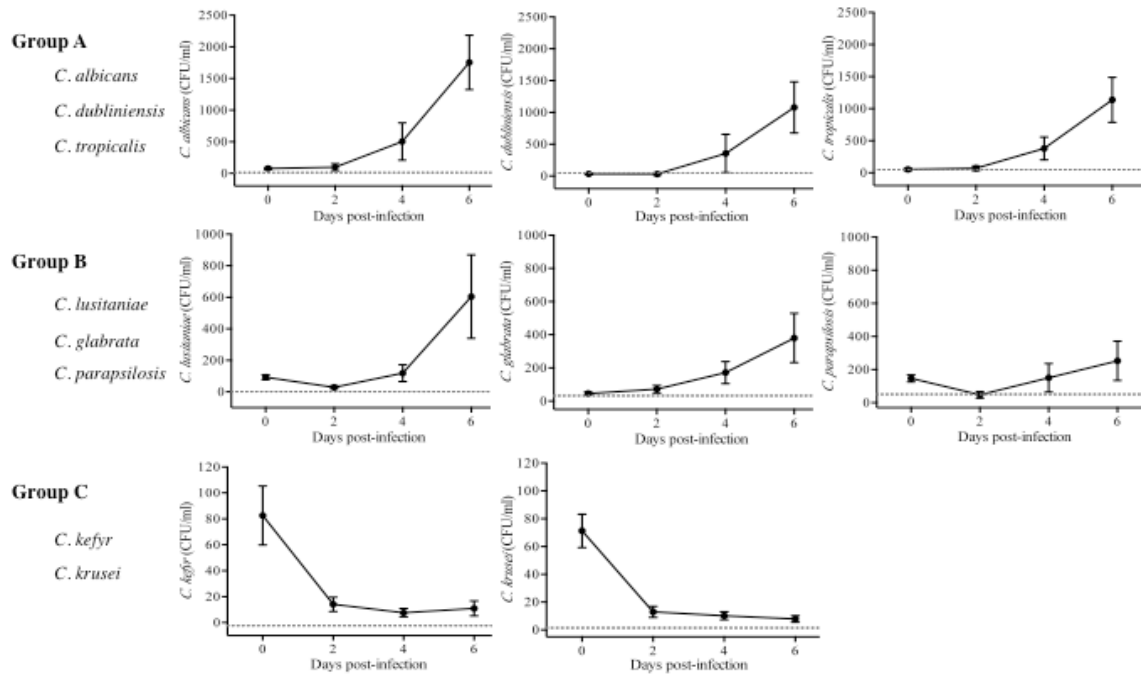

**Fig. S1. Evolution profiles of the fungal burden within granulomatous structures of *Candida* spp.** The fungal burden was followed at 0, 2, 4 and 6 days after infection of human peripheral blood mononuclear and polymorphonuclear cells with living yeasts from different *Candida* species. Results are expressed as colony-forming units per ml (CFU/ml). Data are represented as the mean + SEM of the fungal burden from ten healthy donors for each *Candida* species. Profiling was performed according to the two-way ANOVA statistical analysis ( $\alpha = 0.05$ ). Three profiles were identified: profile A: *C. albicans*, *C. dubliniensis* and *C. tropicalis* showing “high” fungal burdens. Profile B: *C. lusitanae*, *C. glabrata* and *C. parapsilosis* showing “intermediate” fungal burdens. Profile C: *C. kefyr* and *C. krusei* presenting “low” fungal burdens.

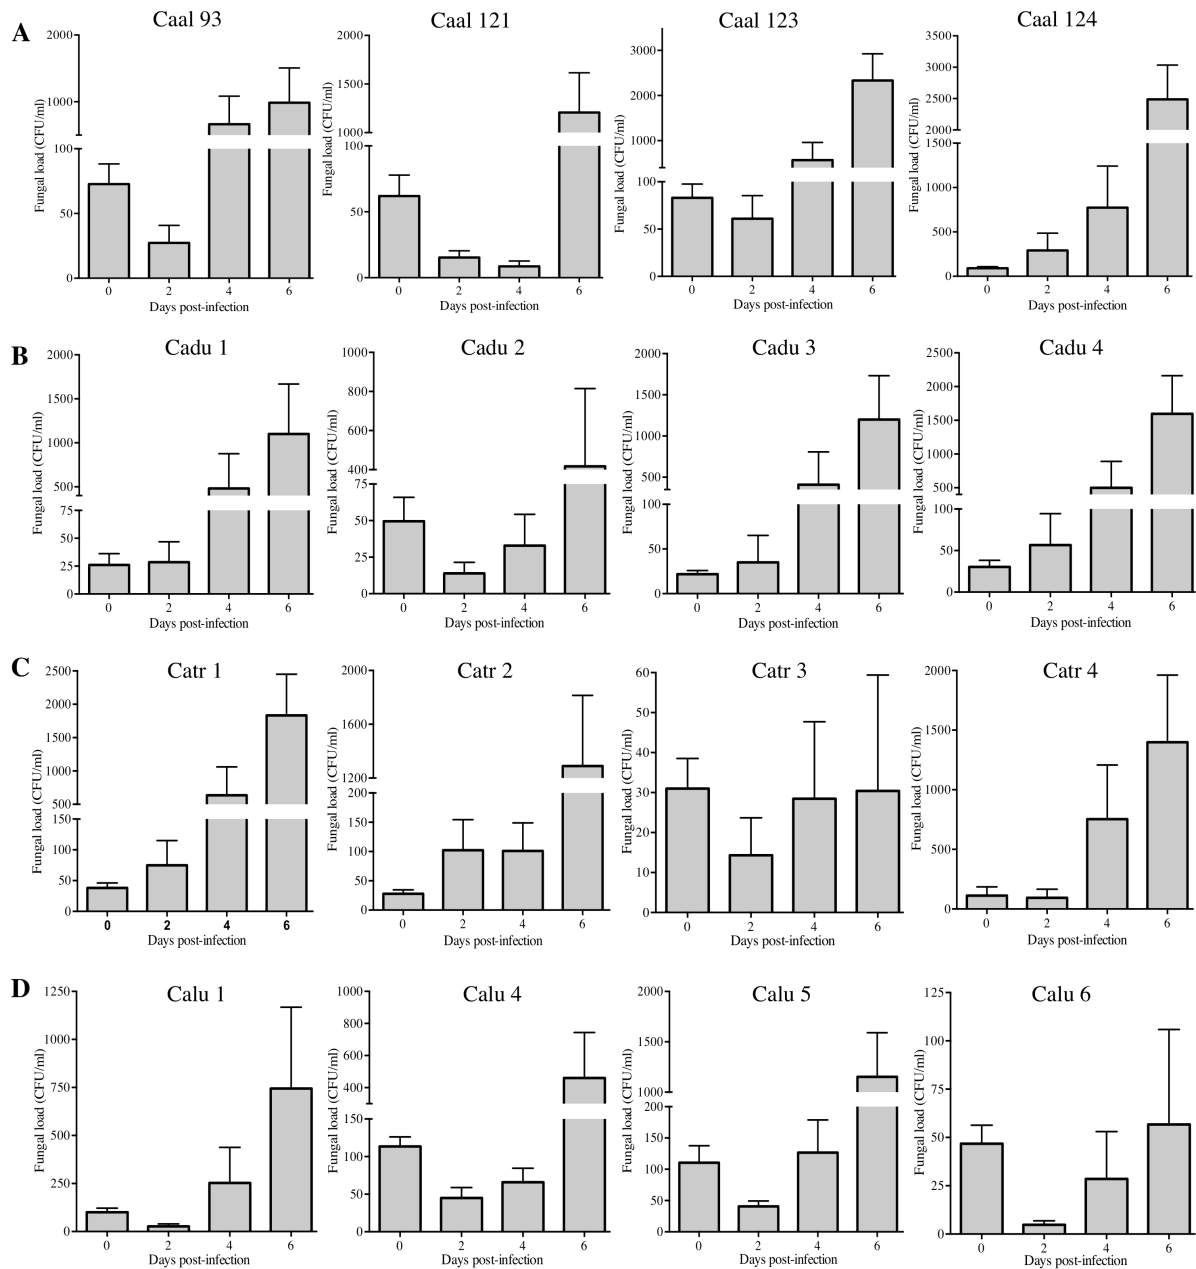

**Fig. S2. Evolution of the fungal burden within granulomatous structures of 32 clinical isolates of *Candida* spp.** The fungal burden was followed at 0, 2, 4 and 6 days after infection of human peripheral blood mononuclear and polymorphonuclear cells with living yeasts from different *Candida* species. Results are expressed as colony-forming units per ml (CFU/ml). Data are represented as the mean + SEM of the fungal burden from ten healthy donors for each *Candida* species: **(A)** *C. albicans*, **(C)** *C. dubliniensis*, **(C)** *C. tropicalis* and **(D)** *C. lusitaniae*.

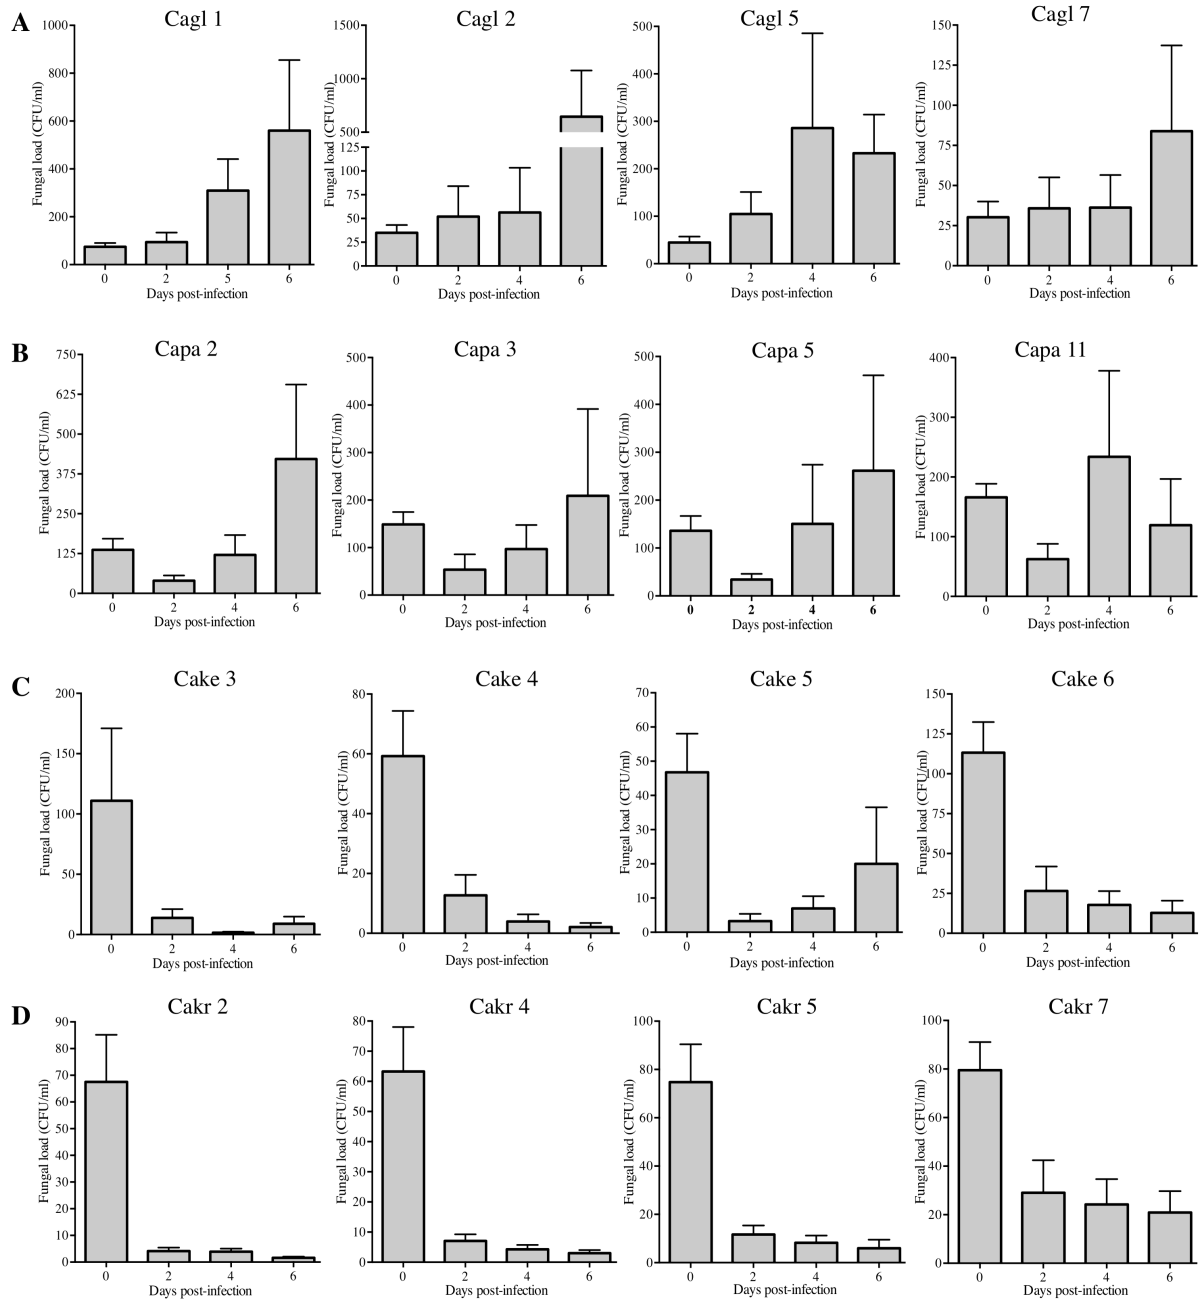

**Fig. S3. Evolution of the fungal burden within granulomatous structures of 32 clinical isolates of *Candida* spp.** The fungal burden was followed at 0, 2, 4 and 6 days after infection of human peripheral blood mononuclear and polymorphonuclear cells with living yeasts from different *Candida* species. Results are expressed as colony-forming units per ml (CFU/ml). Data are represented as the mean + SEM of fungal burden from ten healthy donors for each *Candida* species: **(A)** *C. glabrata*, **(B)** *C. parapsilosis*, **(C)** *C. kefyr* and **(D)** *C. krusei*.

**Table S1.** Distribution of granulocyte, monocyte and T cell subsets based on CD66, CD14, CD56, CD4 and CD8 from persistent-infection and controlled-infection granulomas after infection with *C. albicans*, *C. dubliniensis* and *C. tropicalis* (group A).

|                        | Day 0         |               |          |            | Day 2         |               |          |            | Day 4         |               |          |            | Day 6         |               |          |            |
|------------------------|---------------|---------------|----------|------------|---------------|---------------|----------|------------|---------------|---------------|----------|------------|---------------|---------------|----------|------------|
|                        | Mean (SD) PI  | Mean (SD) CI  | <i>p</i> | Mean Diff. | Mean (SD) PI  | Mean (SD) CI  | <i>p</i> | Mean Diff. | Mean (SD) PI  | Mean (SD) CI  | <i>p</i> | Mean Diff. | Mean (SD) PI  | Mean (SD) CI  | <i>p</i> | Mean Diff. |
| <b>CD66+</b>           | 40.24 (9.95)  | 60.33 (13.96) | ****     | -20.1      | 26.26 (18.64) | 46.78 (13.31) | ****     | -20.5      | 14.57 (6.32)  | 15.95 (5.206) | ns       | -1.3       | 7.15 (7.77)   | 12.22 (6.41)  | ns       | -5.1       |
| <b>CD14+</b>           | 6.31 (2.35)   | 5.94 (0.936)  | ns       | 0.4        | 5.43 (3.767)  | 7.133 (1.94)  | ns       | -1.7       | 4.60 (4.51)   | 6.14 (3.11)   | ns       | -2         | 1.16 (1.41)   | 3.52 (2.55)   | *        | -2.4       |
| <b>CD3-CD56+</b>       | 14.26 (4.93)  | 12.13 (4.864) | ns       | 2.2        | 15.2 (6.82)   | 12.96 (5.12)  | ns       | 2.3        | 11.5 (4.952)  | 8.30 (3.969)  | ns       | 3.2        | 13.55 (8.40)  | 4.81 (3.033)  | ****     | 8.7        |
| <b>CD3+CD56+</b>       | 5.56 (6.13)   | 4.28 (1.27)   | ns       | 1.2        | 4.01 (3.30)   | 2.923 (0.92)  | ns       | 1.1        | 4.45 (4.44)   | 2.48 (1.348)  | ns       | 2          | 4.53 (5.43)   | 2.36 (1.10)   | ns       | 2.2        |
| <b>CD3+</b>            | 60.49 (9.42)  | 68.53 (3.435) | ns       | 3.1        | 50.37 (16.17) | 59.70 (7.75)  | *        | -9.1       | 61.55 (13.36) | 63.51 (12.71) | ns       | -1.9       | 50.92 (12.29) | 65.88 (17.77) | ****     | -15        |
| <b>CD4+CD8-</b>        | 45.85 (11.67) | 58.85 (3.993) | ****     | -13        | 40.07 (11.96) | 51.78 (6.931) | ***      | -11.7      | 45.65 (14.76) | 58.31 (10.78) | ****     | -12.7      | 41.46 (12.16) | 59.76 (15.08) | ****     | -18.3      |
| <b>CD4-CD8+</b>        | 26.19 (8.76)  | 18.96 (3.263) | ns       | 4.8        | 23.83 (8.84)  | 15.67 (2.412) | ***      | 8.1        | 23.46 (9.395) | 10.59 (3.33)  | ****     | 12.9       | 20.15 (9.844) | 11.29 (3.68)1 | ****     | 8.9        |
| <b>CD4+:CD8+ ratio</b> | 1.75          | 3.1           |          |            | 1.68          | 3.3           |          |            | 1.94          | 5.51          |          |            | 2.06          | 5.29          |          |            |
| <b>CD4hiCD8hi</b>      | 0.20 (0.17)   | 0.22 (0.04)   | ns       | 0          | 0.33 (0.43)   | 0.15 (0.12)   | ns       | 0.2        | 0.36 (0.50)   | 0.15 (0.11)   | *        | 0.4        | 0.13 (0.17)   | 0.07 (0.06)   | ns       | 0.1        |
| <b>CD4hiCD8lo</b>      | 0.57 (0.55)   | 0.55 (0.30)   | ns       | 0          | 0.47 (0.6434) | 0.38 (0.30)   | ns       | 0.1        | 0.59 (0.85)   | 0.35 (0.23)   | ns       | 0.2        | 0.67 (0.80)   | 0.37 (0.36)   | ns       | 0.3        |
| <b>CD4loCD8hi</b>      | 0.93 (0.76)   | 0.47 (0.22)   | ns       | 0.5        | 0.73 (0.89)   | 0.31 (0.18)   | ns       | 0.4        | 1.02 (1.441)  | 0.23 (0.15)   | **       | 0.8        | 1.32 (1.079)  | 0.46 (0.31)   | ***      | 0.9        |

Results were expressed as the median fraction of cells expressing the marker(s) +/- SD among specific gates. Significant differences were evaluated by comparison between persistent-infection (PI) and controlled-infection (CI) status over time using one-way ANOVA with Tukey's multiple comparisons test. \*,  $p < 0.05$ ; \*\*,  $p < 0.001$ ; \*\*\*,  $p < 0.0001$ ; \*\*\*\*,  $p < 0.00001$ , ns: not significant.

**Table S2.** Distribution of granulocyte, monocyte and T cell subsets based on CD66, CD14, CD56, CD4 and CD8 from persistent-infection and controlled-infection granulomas after infection with *C. lusitaniae*, *C. parapsilosis* and *C. glabrata* (group B).

|                        | Day 0         |               |          |            | Day 2         |               |          |            | Day 4         |               |          |            | Day 6         |               |          |            |
|------------------------|---------------|---------------|----------|------------|---------------|---------------|----------|------------|---------------|---------------|----------|------------|---------------|---------------|----------|------------|
|                        | Mean (SD) PI  | Mean (SD) CI  | <i>p</i> | Mean Diff. | Mean (SD) PI  | Mean (SD) CI  | <i>p</i> | Mean Diff. | Mean (SD) PI  | Mean (SD) CI  | <i>p</i> | Mean Diff. | Mean (SD) PI  | Mean (SD) CI  | <i>p</i> | Mean Diff. |
| <b>CD66+</b>           | 41.25 (12.93) | 53.87 (14.91) | ****     | -12.6      | 31.33 (18.40) | 42.06 (16.82) | ****     | -22.5      | 15.96 (4.730) | 16.67 (4.73)  | ns       | -0.7       | 6.73 (6.82)   | 9.48 (7.70)   | ns       | -2.7       |
| <b>CD14+</b>           | 6.11 (2.075)  | 6.579 (1.054) | ns       | -0.3       | 6.10 (3.70)   | 6.48 (3.22)   | ns       | -1.8       | 3.88 (2.77)   | 5.71 (3.76)   | ns       | -1.1       | 2.70 (2.61)   | 2.53 (2.81)   | ns       | -0.1       |
| <b>CD3-CD56+</b>       | 13.98 (4.79)  | 13.12 (5.19)  | ns       | 0.8        | 15.32 (6.80)  | 13.37 (6.50)  | ns       | 10.5       | 13.32 (6.03)  | 9.11 (4.42)   | **       | 4.2        | 9.86 (5.404)  | 5.95 (3.53)   | *        | 3.9        |
| <b>CD3+CD56+</b>       | 5.91 (5.733)  | 4.618 (4.402) | ns       | 1.2        | 4.35 (3.317)  | 3.03 (2.33)   | ns       | 1.3        | 4.14 (3.88)   | 3.50 (3.01)   | ns       | 0.6        | 4.27 (4.98)   | 3.38 (4.67)   | ns       | 0.8        |
| <b>CD3+</b>            | 62.31 (10.05) | 64.03 (7.316) | ns       | -1.7       | 52.68 (13.42) | 52.32 (13.01) | ns       | 0.3        | 59.47 (11.41) | 65.06 (11.33) | ns       | -5.5       | 53.30 (13.61) | 56.87 (17.85) | ns       | -3.5       |
| <b>CD4+CD8-</b>        | 48.30 (12.44) | 52.06 (10.36) | ns       | -3.7       | 41.24 (12.71) | 43.66 (10.93) | ns       | -2.4       | 46.34 (13.71) | 53.64 (14.49) | ns       | -7.3       | 43.31 (14.01) | 47.93 (18.15) | ns       | -4.6       |
| <b>CD4-CD8+</b>        | 26.21 (8.43)  | 21.35 (7.107) | ns       | 4.8        | 24.75 (9.74)  | 17.84 (8.23)  | **       | 6.9        | 22.19 (10.52) | 16.65 (8.96)  | ns       | 5.6        | 19.15 (8.60)  | 14.83 (9.287) | ns       | 4.3        |
| <b>CD4+:CD8+ ratio</b> | 1.84          | 2.44          |          |            | 1.67          | 2.45          |          |            | 2.08          | 3.22          |          |            | 2.26          | 3.23          |          |            |
| <b>CD4hiCD8hi</b>      | 0.20 (0.13)   | 0.23 (0.16)   | ns       | 0          | 0.28 (0.36)   | 0.26 (0.43)   | ns       | 0          | 0.28 (0.34)   | 0.33 (0.45)   | ns       | -0.1       | 0.11 (0.12)   | 0.11 (0.13)   | ns       | 0          |
| <b>CD4hiCD8lo</b>      | 0.44 (0.32)   | 0.52 (0.36)   | ns       | -0.1       | 0.32 (0.29)   | 0.39 (0.35)   | ns       | -0.1       | 0.36 (0.29)   | 0.40 (0.32)   | ns       | 0          | 0.45 (0.36)   | 0.43 (0.45)   | ns       | 0          |
| <b>CD4loCD8hi</b>      | 0.70 (0.58)   | 0.88 (0.78)   | ns       | -0.2       | 0.62 (0.75)   | 0.66 (0.10)   | ns       | 0          | 0.72 (0.91)   | 0.83 (1.31)   | ns       | -0.1       | 0.94 (0.82)   | 0.10 (1.14)   | ns       | 0          |

Results were expressed as the median fraction of cells expressing the marker(s) +/- SD among specific gates. Significant differences were evaluated by comparison between persistent-infection (PI) and controlled-infection (CI) status over time using one-way ANOVA with Tukey's multiple comparisons test. \*,  $p < 0.05$ ; \*\*,  $p < 0.001$ ; \*\*\*,  $p < 0.0001$ ; \*\*\*\*,  $p < 0.00001$ , ns: not significant.

**Table S3.** Distribution of granulocyte, monocyte and T cell subsets based on CD66, CD14, CD56, CD4 and CD8 from persistent-infection and controlled-infection granulomas after infection with *C. krusei* and *C. kefyr* (group C).

|                        | Day 0         |                         |                         | Day 2         |                         |                         | Day 4         |                         |                         | Day 6         |                         |                         |
|------------------------|---------------|-------------------------|-------------------------|---------------|-------------------------|-------------------------|---------------|-------------------------|-------------------------|---------------|-------------------------|-------------------------|
|                        | Mean (SD) CI  | <i>p</i> vs. group A CI | <i>p</i> vs. group B CI | Mean (SD) IC  | <i>p</i> vs. group A CI | <i>p</i> vs. group B CI | Mean (SD) CI  | <i>p</i> vs. group A CI | <i>p</i> vs. group B CI | Mean (SD) CI  | <i>p</i> vs. group A CI | <i>p</i> vs. group B CI |
| <b>CD66+</b>           | 48.61 (15.42) | ***                     | ns                      | 36.35 (18.29) | **                      | ns                      | 16.13 (5.17)  | ns                      | ns                      | 8.50 (7.41)   | ns                      | ns                      |
| <b>CD14+</b>           | 5.9 (2.172)   | ns                      | ns                      | 6.50 (3.41)   | ns                      | ns                      | 4.94 (4.03)   | ns                      | ns                      | 2.48 (2.22)   | ns                      | ns                      |
| <b>CD3-CD56+</b>       | 13.55 (5.00)  | ns                      | ns                      | 15.98 (7.10)  | *                       | ns                      | 10.28 (4.58)  | ns                      | ns                      | 7.79 (4.32)   | **                      | ns                      |
| <b>CD3+CD56+</b>       | 5.14 (5.10)   | ns                      | ns                      | 3.619 (2.90)  | ns                      | ns                      | 3.74 (3.62)   | ns                      | ns                      | 3.79 (4.71)   | ns                      | ns                      |
| <b>CD3+</b>            | 63.17 (8.81)  | ns                      | ns                      | 52.58 (13.12) | ns                      | ns                      | 63.05 (11.30) | ns                      | ns                      | 56.01 (14.63) | **                      | ns                      |
| <b>CD4+CD8-</b>        | 50.18 (11.58) | ns                      | ns                      | 42.79 (11.84) | ns                      | ns                      | 50.76 (14.04) | ns                      | ns                      | 46.16 (15.00) | ****                    | ns                      |
| <b>CD4-CD8+</b>        | 23.78 (8.15)  | ns                      | ns                      | 22.24 (9.20)  | *                       | ns                      | 18.84 (9.82)  | ***                     | ns                      | 17.65 (9.46)  | *                       | ns                      |
| <b>CD4+:CD8+ ratio</b> | 2.11          |                         |                         | 1.92          |                         |                         | 2.69          |                         |                         | 2.61          |                         |                         |
| <b>CD4hiCD8hi</b>      | 0.21 (0.15)   | ns                      | ns                      | 0.28 (0.37)   | ns                      | ns                      | 0.29 (0.43)   | ns                      | ns                      | 0.11 (0.12)   | ns                      | ns                      |
| <b>CD4hiCD8lo</b>      | 0.49 (0.35)   | ns                      | ns                      | 0.34 (0.35)   | ns                      | ns                      | 0.40 (0.34)   | ns                      | ns                      | 0.51 (0.49)   | ns                      | ns                      |
| <b>CD4loCD8hi</b>      | 0.79 (0.69)   | ns                      | ns                      | 0.65 (0.888)  | ns                      | ns                      | 0.79 (1.17)   | ns                      | ns                      | 1.00 (1.00)   | ns                      | ns                      |

Results are expressed as median fraction of cells expressing the marker(s) +/- SD among specific gates. Significant differences were evaluated by comparison of controlled-infection (CI) status between profile A and B over time using one-way ANOVA with Tukey's multiple comparisons test. \*,  $p < 0.05$ ; \*\*,  $p < 0.001$ ; \*\*\*,  $p < 0.0001$ ; \*\*\*\*,  $p < 0.00001$ , ns: not significant.
