# Supplementary material for: Specific Human and Candida Cellular Interactions Lead to Controlled or Persistent Infection Outcomes during Granuloma-Like Formation
Source: PubMed Central journal article supplement (PMC5203659; doi:10.1128/iai.00807-16), 2016-12-29
Supplement: IAI.00807-16_zii999091935s4.pdf [file IAI.00807-16_zii999091935s4.pdf]

**Video S1. Representative movie from microscopy time lapse series.** Human leucocytes were infected with GFP-tagged *C. albicans* blastoconidia at a MOI of 2000:1. Phagocytosis and host response against *C. albicans* filaments was detected over 72 h of incubation with a 300 W xenon lamp fitted with a 488 nm excitation filter. Emission at 515 nm was used for analysis of *C. albicans* fluorescence with a Leica DMI6000B camera cool Snap HQ2 and processed with Metamorph imaging software version 7.7.4.0.

**Video S2. Representative movie from microscopy time lapse series showing human leucocyte infected by GFP-tagged *C. albicans* blastoconidia (MOI of 2000:1).** Cells were illuminated at day 0 and every 10 min over 72 h of incubation with a 300 W xenon lamp fitted with a 488 nm excitation filter. Emission at 515 nm was used for analysis of *C. albicans* fluorescence with a Leica DMI6000B camera cool Snap HQ2 and processed with Metamorph imaging software version 7.7.4.0.
